# Supplementary material
Source: publisher figshare collection journal article supplement (https://sage.figshare.com/ndownloader/files/14949305)
Supplement: Supplementary file 1 [file 14949305]

## Supplemental Material

**Table S1.** Baseline, post-treatment, pre-post-treatment changes and between-group differences (95% confidence interval) for neck range of motion.

| Outcome/ Group                       | Baseline<br>M (SD) | Two weeks Post-treatment<br>M (SD) | Within-Group<br>Score Changes | Between-Group<br>Score Changes |
|--------------------------------------|--------------------|------------------------------------|-------------------------------|--------------------------------|
| Active flexion (tape)                |                    |                                    |                               |                                |
| Interferential current therapy group | 4.77 (1.81)        | 3.94 (1.44)                        | 0.82 (0.44, 1.21)**           | -0.15 (-0.83, 0.52)            |
| Supervised exercises group           | 6.52 (10.79)       | 4.10 (1.67)                        | 2.42 (-0.95, 5.79)            |                                |
| Passive flexion (tape)               |                    |                                    |                               |                                |
| Interferential current therapy group | 3.74 (1.77)        | 2.50 (1.34)                        | 1.24 (0.88, 1.61)**           | -0.54 (-1.18, 0.10)            |
| Supervised exercises group           | 3.93 (1.71)        | 3.03 (1.60)                        | 0.89 (0.57, 1.22)**           |                                |
| Active flexion (goniometer)          |                    |                                    |                               |                                |
| Interferential current therapy group | 37.05 (9.28)       | 40.45 (10.88)                      | -3.41 (-5.49, -1.32)**        | 1.14 (-3.67, 5.95)             |
| Supervised exercises group           | 35.50 (10.06)      | 39.31 (11.29)                      | -3.81 (-5.10, -2.52)**        |                                |

|                                      |               |               |                        |                     |
|--------------------------------------|---------------|---------------|------------------------|---------------------|
| Passive flexion (goniometer)         |               |               |                        |                     |
| Interferential current therapy group | 41.14 (10.43) | 46.95 (11.87) | -5.81 (-7.49, -4.13)** | 3.19 (-1.79, 8.17)  |
| Supervised exercises group           | 39.45 (11.07) | 43.76 (11.05) | -4.31 (-5.85, -2.77)** |                     |
| Active Extension (tape)              |               |               |                        |                     |
| Interferential current therapy group | 17.13 (2.92)  | 17.05 (2.82)  | 0.08 (-0.94, 1.09)     | 0.70 (-0.76, 2.15)  |
| Supervised exercises group           | 17.08 (1.89)  | 16.36 (3.81)  | 0.72 (-0.42, 1.87)     |                     |
| Passive Extension (tape)             |               |               |                        |                     |
| Interferential current therapy group | 18.12 (3.42)  | 18.06 (2.99)  | 0.06 (-1.11, 1.24)     | 0.81 (-0.69, 2.31)  |
| Supervised exercises group           | 17.94 (1.76)  | 17.25 (3.88)  | 0.69 (-0.52, 1.89)     |                     |
| Active Extension (goniometer)        |               |               |                        |                     |
| Interferential current therapy group | 43.05 (6.51)  | 43.81 (9.13)  | -0.76 (-2.82, 1.30)    | -1.81 (-5.79, 2.17) |
| Supervised exercises group           | 44.40 (7.77)  | 45.62 (9.22)  | -1.21 (-2.08, -0.35)** |                     |

|                                           |              |               |                        |                     |
|-------------------------------------------|--------------|---------------|------------------------|---------------------|
| Passive Extension (goniometer)            |              |               |                        |                     |
| Interferential current therapy group      | 48.12 (7.22) | 49.33 (10.63) | -1.21 (-3.62, 1.19)    | -0.76 (-5.20, 3.68) |
| Supervised exercises group                | 49.02 (8.80) | 50.10 (9.81)  | -1.07 (-1.83, -0.31)** |                     |
| Active right lateral-flexion (tape)       |              |               |                        |                     |
| Interferential current therapy group      | 9.42 (2.76)  | 8.83 (2.07)   | 0.59 (-0.04, 1.22)     | 0.56 (-0.43, 1.55)  |
| Supervised exercises group                | 8.92 (2.42)  | 8.27 (2.48)   | 0.65 (0.44, 0.86)**    |                     |
| Passive right lateral-flexion (tape)      |              |               |                        |                     |
| Interferential current therapy group      | 8.70 (2.38)  | 7.79 (2.05)   | 0.91 (0.53, 1.29)**    | 0.64 (-0.23, 1.51)  |
| Supervised exercises group                | 8.05 (2.29)  | 7.15 (1.98)   | 0.90 (0.63, 1.17)**    |                     |
| Active right lateral-flexion (goniometer) |              |               |                        |                     |
| Interferential current therapy group      | 30.62 (6.89) | 33.21 (5.57)  | -2.60 (-4.57, -0.62)*  | 0.74 (-1.83, 3.31)  |
| Supervised exercises group                | 30.02 (5.96) | 32.48 (6.26)  | -2.45 (-3.23, -1.68)** |                     |

|                                            |              |              |                        |                    |
|--------------------------------------------|--------------|--------------|------------------------|--------------------|
| Passive right lateral-flexion (goniometer) |              |              |                        |                    |
| Interferential current therapy group       | 34.57 (6.63) | 38.19 (6.17) | -3.62 (-5.41, -1.83)** | 1.38 (-1.42, 4.18) |
| Supervised exercises group                 | 33.24 (5.70) | 36.81 (6.70) | -3.57 (-4.69, -2.45)** |                    |
| Active left lateral-flexion (tape)         |              |              |                        |                    |
| Interferential current therapy group       | 9.69 (2.59)  | 8.75 (2.29)  | 0.95 (0.59, 1.30)**    | 0.55 (-0.46, 1.57) |
| Supervised exercises group                 | 8.75 (2.29)  | 8.19 (2.38)  | 0.80 (0.58, 1.03)**    |                    |
| Passive left lateral-flexion (tape)        |              |              |                        |                    |
| Interferential current therapy group       | 8.40 (2.34)  | 7.75 (2.08)  | 0.85 (0.37, 1.33)**    | 0.48 (-0.36, 1.32) |
| Supervised exercises group                 | 7.76 (2.19)  | 7.07 (1.80)  | 0.70 (0.36, 1.03)**    |                    |
| Active left lateral-flexion (goniometer)   |              |              |                        |                    |
| Interferential current therapy group       | 31.67 (7.08) | 34.05 (5.72) | -2.38 (-3.87, -0.90)** | 0.95 (-1.66, 3.57) |
| Supervised exercises group                 | 29.79 (5.70) | 33.10 (6.31) | -3.31 (-4.20, -2.42)** |                    |

Passive left lateral-flexion (goniometer)

Interferential current therapy group 36.48 (7.74) 39.71 (6.38) -3.24 (-4.94, -1.54)\*\* 2.00 (-0.99, 4.99)

Supervised exercises group 33.83 (5.98) 37.71 (7.36) -3.88 (-5.35, -2.42)\*\*

Active right rotation (tape)

Interferential current therapy group 8.79 (2.57) 7.96 (2.33) 0.84 (0.40, 1.29)\*\* 0.42 (-0.70, 1.55)

Supervised exercises group 7.87 (2.17) 7.53 (2.84) 0.34 (-0.35, 1.03)

Passive right rotation (tape)

Interferential current therapy group 7.74 (2.28) 6.74 (2.24) 0.99 (0.40, 1.28)\*\* 0.64 (-0.27, 1.55)

Supervised exercises group 6.86 (1.97) 6.10 (1.95) 0.75 (0.50, 1.00)\*\*

Active right rotation (goniometer)

Interferential current therapy group 53.38 (12.07) 58.81 (9.88) -5.43 (-8.55, -2.31)\*\* 1.81 (-2.31, 5.93)\*\*

Supervised exercises group 54.81 (8.27) 57.00 (9.08) -2.19 (-3.10, -1.28)\*\*

|                                      |               |               |                        |                      |
|--------------------------------------|---------------|---------------|------------------------|----------------------|
| Passive right rotation (goniometer)  |               |               |                        |                      |
| Interferential current therapy group | 60.60 (9.43)  | 66.19 (10.39) | -5.60 (-7.51, -3.68)** | 3.38 (-0.99, 7.76)** |
| Supervised exercises group           | 59.52 (8.64)  | 62.81 (9.75)  | -3.29 (-4.36, -2.12)** |                      |
| Active left rotation (tape)          |               |               |                        |                      |
| Interferential current therapy group | 8.94 (2.34)   | 8.07 (2.26)   | 0.87 (0.52, 1.22)**    | 0.82 (-0.09, 1.73)   |
| Supervised exercises group           | 8.16 (1.99)   | 7.25 (1.92)   | 0.91 (0.58, 1.24)**    |                      |
| Passive left rotation (tape)         |               |               |                        |                      |
| Interferential current therapy group | 7.89 (2.26)   | 6.81 (2.26)   | 1.08 (0.72, 1.45)**    | 0.88 (-0.01, 1.76)   |
| Supervised exercises group           | 6.92 (1.89)   | 5.93 (1.78)   | 0.99 (0.70, 1.27)**    |                      |
| Active left rotation (goniometer)    |               |               |                        |                      |
| Interferential current therapy group | 58.55 (10.12) | 61.95 (9.52)  | -3.41 (-5.05, -1.76)** | 4.17 (0.01, 8.25)    |
| Supervised exercises group           | 54.21 (8.36)  | 57.79 (9.29)  | -3.57 (-4.83, -2.32)** |                      |

Passive left rotation (goniometer)

|                                      |               |               |                        |                   |
|--------------------------------------|---------------|---------------|------------------------|-------------------|
| Interferential current therapy group | 64.31 (10.51) | 68.93 (10.32) | -4.62 (-6.11, -3.12)** | 5.07 (0.67, 9.47) |
| Supervised exercises group           | 60.29 (8.92)  | 63.86 (9.96)  | -3.57 (-4.93, -2.21)** |                   |

---

M (SD) = Mean (Standard deviation).

\* $p < 0.05$ , \*\* $p < 0.01$ .

**Appendix 1.** Detailed description of the supervised exercises protocol.

The exercises were applied in series of three repetitions, with a minimum of three repetitions per series. The number of repetitions per series was increased up to a maximum of five, in a progressive manner, according to perceived muscular fatigue. In the first two sessions, only ergonomic advice and stretching exercises were provided. Starting in the third session, isometric strengthening exercises were included. The times in the position of maximum stretch were between three and ten seconds according to the patient's tolerance. The muscle groups worked on were the muscles of the posterior region of the neck, the trapezius, angular scapula, the scalene muscles and the sternocleidomastoid. Isometric contractions were maintained between five and ten seconds. To work on isometric contraction, we worked in a more functional way: flexion, extension, lateral flexion and rotation movement. From the fourth session to the end of the intervention programme, isometric strengthening exercises were complemented with the ocular-cervical kinetic re-education exercises. The exercises were cumulative, so the first sessions were shorter. The time was progressively increased from twenty minutes (first sessions) to forty-five minutes (last sessions).
